# Supplementary material
Source: Springer Nature journal article supplement (https://www.springerprofessional.de/resource/supplementary/13638_2014_1077_MOESM6_ESM.pdf/11899032)

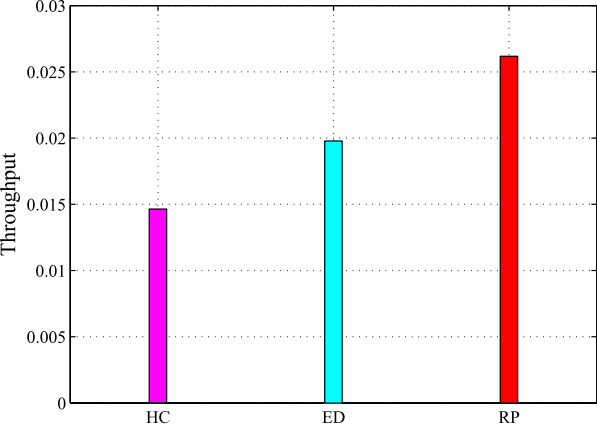

(a)

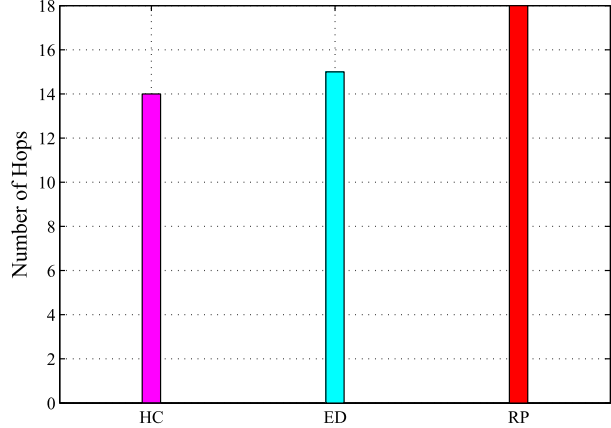

(b)

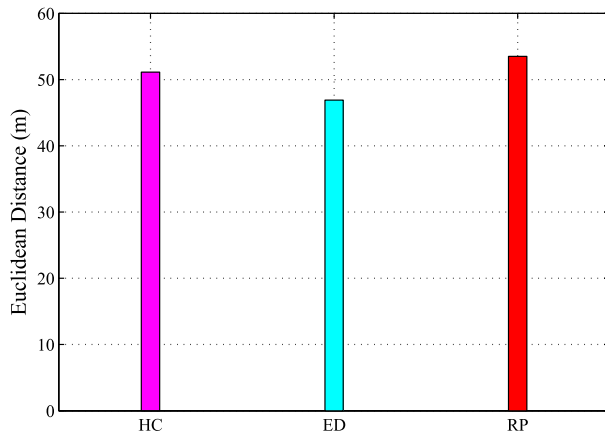

(c)

Supplement: MOESM6 [file 11899032]
